# Supplementary material for: The effect of outdoor air pollution on the risk of hospitalisation for bronchiolitis in infants: a systematic review
Source: PeerJ journal article supplement (doi:10.7717/peerj.5352), 2018-08-28
Supplement: Supplementary_File_S4_-_GRADE_assessment_of_eligible_studies.pdf [file Supplementary_File_S4_-_GRADE_assessment_of_eligible_studies.pdf]

Supplementary File S4. GRADE Assessments

| <b>Pollutant and exposure</b> | <b>Number of studies and design, and number of infants</b>                                                              | <b>Conclusion</b>                               | <b>Study limitations</b> | <b>Inconsistency</b> | <b>Imprecision</b> | <b>Grade of evidence</b> |
|-------------------------------|-------------------------------------------------------------------------------------------------------------------------|-------------------------------------------------|--------------------------|----------------------|--------------------|--------------------------|
| PM2.5 acute exposure          | 2 case-crossover studies and of 41,474 infants (Karr et al. 2004; Karr et al. 2006)                                     | Does not seem to affect risk of hospitalisation | No change                | No change            | +1                 | Moderate                 |
| PM2.5 subchronic exposure     | 3 case-control studies including 33,394 infants (Karr et al. 2007; Karr et al. 2009a; Karr et al. 2009b)                | Unclear effect on risk of hospitalisation       | +1                       | -1                   | +1                 | Moderate                 |
| PM2.5 lifetime exposure       | 4 case-control studies of 52,768 infants (Girguis et al. 2017; Karr et al. 2007; Karr et al. 2009a; Karr et al. 2009b)  | May increase risk of hospitalisation            | +1                       | -1                   | +1                 | Moderate                 |
| PM10 acute exposure           | 1 case crossover study of 16588 infants (Segala et al. 2008)                                                            | Unclear effect on risk of hospitalisation       | +1                       | No change            | No change          | Low                      |
| PM10 subchronic exposure      | 1 case control study of 11,675 infants (Karr et al. 2009a)                                                              | Does not seem to affect risk of hospitalisation | +1                       | No change            | No change          | Low                      |
| PM10 lifetime exposure        | 1 case crossover study and 1 case control study, including 17,454 infants (Abdul Rahman et al. 2017; Karr et al. 2009a) | Unclear effect on risk of hospitalisation       | -1                       | No change            | No change          | Low                      |

|                         |                                                                                                                                                          |                                                 |    |           |           |          |
|-------------------------|----------------------------------------------------------------------------------------------------------------------------------------------------------|-------------------------------------------------|----|-----------|-----------|----------|
| NO2 acute exposure      | 3 case-crossover studies of 58,062 infants (Karr et al. 2004; Karr et al. 2006; Segala et al. 2008)                                                      | Unclear effect on risk of hospitalisation       | +1 | No change | +1        | Moderate |
| NO2 subchronic exposure | 2 case-control studies of 30,270 infants (Karr et al. 2007; Karr et al. 2009a)                                                                           | Unclear effect on risk of hospitalisation       | +1 | No change | +1        | Moderate |
| NO2 lifetime exposure   | 2 case control studies and 2 case crossover studies of 39,173 infants (Abdul Rahman et al. 2017; Karr et al. 2007; Karr et al. 2009a; Karr et al. 2009b) | Unclear effect on risk of hospitalisation       | -1 | No change | +1        | Low      |
| SO2 acute exposure      | 1 case crossover study of 16,588 infants (Segala et al. 2008)                                                                                            | May increase risk of hospitalisation            | +1 | No change | No change | Low      |
| SO2 subchronic exposure | 1 case crossover study of 11,675 infants (Karr et al. 2009a)                                                                                             | May increase risk of hospitalisation            | +1 | No change | No change | Low      |
| SO2 lifetime exposure   | 1 case control study of 11,675 infants (Karr et al. 2009a)                                                                                               | May increase risk of hospitalisation            | +1 | No change | No change | Low      |
| CO acute exposure       | 2 case crossover study of 41,474 infants (Karr et al. 2004; Karr et al. 2006)                                                                            | Does not seem to affect risk of hospitalisation | +1 | No change | No change | Low      |

|                           |                                                                                                                                    |                                                                                                      |    |           |    |          |
|---------------------------|------------------------------------------------------------------------------------------------------------------------------------|------------------------------------------------------------------------------------------------------|----|-----------|----|----------|
| CO subchronic exposure    | 2 case control studies of 30,270 infants (Karr et al. 2007; Karr et al. 2009a)                                                     | Unclear effect on risk of hospitalisation                                                            | +1 | No change | +1 | Moderate |
| CO lifetime exposure      | 2 case control studies and 1 case crossover study of 36049 infants (Abdul Rahman et al. 2017; Karr et al. 2007; Karr et al. 2009a) | Unclear effect on risk of hospitalisation                                                            | -1 | No change | +1 | Low      |
| Ozone acute exposure      | No studies                                                                                                                         | No assessment can be made                                                                            |    |           |    |          |
| Ozone subchronic exposure | 2 case control studies of 30,270 infants (Karr et al. 2007; Karr et al. 2009a)                                                     | Does not seem to increase risk of hospitalisation and may be associated with lower risk of admission | +1 | No change | +1 | Moderate |
| Ozone lifetime exposure   | 2 case control studies and 1 case crossover study of 36049 infants (Abdul Rahman et al. 2017; Karr et al. 2007; Karr et al. 2009a) | Does not seem to increase risk of hospitalisation and may be associated with lower risk of admission | -1 | No change | +1 | Low      |

- Abdul Rahman SR, Ismail SNS, Sahani M, Ramli MF, and Latif MT. 2017. A case crossover analysis of primary air pollutants association on acute respiratory infection (ARI) among children in urban region of Klang valley, Malaysia. *Annals of Tropical Medicine and Public Health* 10:44-55. 10.4103/ATMPH.ATMPH\_75\_17
- Girguis MS, Strickland MJ, Hu XF, Liu Y, Chang HH, Belanoff C, Bartell SM, and Vieira VM. 2017. Chronic PM2.5 exposure and risk of infant bronchiolitis and otitis media clinical encounters. *International Journal of Hygiene and Environmental Health* 220:1055-1063. 10.1016/j.ijheh.2017.06.007
- Karr C, Kaufman J, Lumley T, Davis R, Shepherd K, Ritz B, and Larson T. 2004. Effect of ambient air pollution on infant bronchiolitis. *Epidemiology* 15:S31-S32. 10.1097/00001648-200407000-00068

- Karr C, Lumley T, Schreuder A, Davis R, Larson T, Ritz B, and Kaufman J. 2007. Effects of subchronic and chronic exposure to ambient air pollutants on infant bronchiolitis. *American Journal of Epidemiology* 165:553-560. 10.1093/aje/kwk032
- Karr C, Lumley T, Shepherd K, Davis R, Larson T, Ritz B, and Kaufman J. 2006. A case-crossover study of wintertime ambient air pollution and infant bronchiolitis. *Environmental Health Perspectives* 114:277-281. 10.1289/ehp.8313
- Karr CJ, Demers PA, Koehoorn MW, Lencar CC, Tamburic L, and Brauer M. 2009a. Influence of ambient air pollutant sources on clinical encounters for infant bronchiolitis. *American Journal of Respiratory and Critical Care Medicine* 180:995-1001. 10.1164/rccm.200901-0117OC
- Karr CJ, Rudra CB, Miller KA, Gould TR, Larson T, Sathyanarayana S, and Koenig JQ. 2009b. Infant exposure to fine particulate matter and traffic and risk of hospitalization for RSV bronchiolitis in a region with lower ambient air pollution. *Environmental Research* 109:321-327. 10.1016/j.envres.2008.11.006
- Segala C, Poizeau D, Mesbah M, Willems S, and Maidenberg M. 2008. Winter air pollution and infant bronchiolitis in Paris. *Environmental Research* 106:96-100. <https://dx.doi.org/10.1016/j.envres.2007.05.003>
